# Supplementary material for: Hydrothermal synthesis and electrochemical properties of dispersed LiMnPO4 wedges
Source: Royal Society of Chemistry journal article supplement (doi:10.1039/c3ce40890f), 2013-01-01
Supplement: c3ce40890f.pdf [file c3ce40890f.pdf]

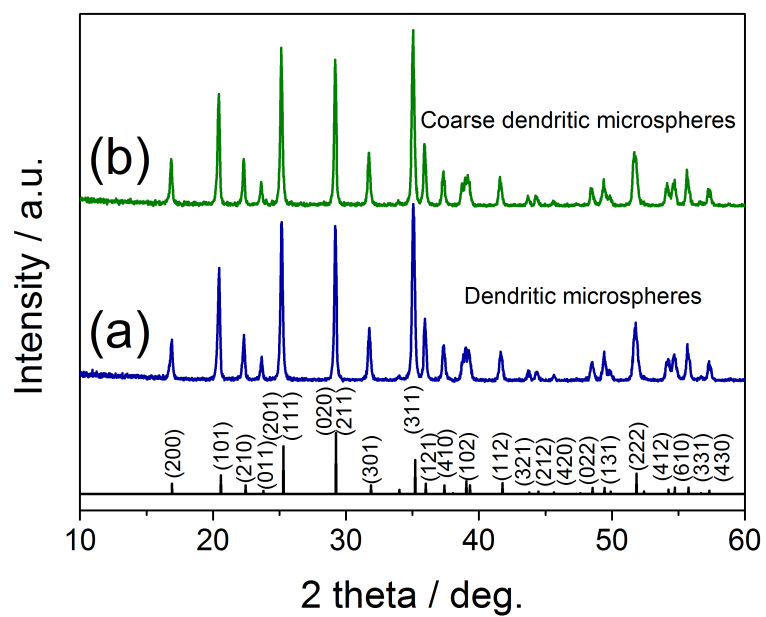

**Fig. S1** XRD patterns of the dendritic microspheres and the coarse dendritic microspheres.

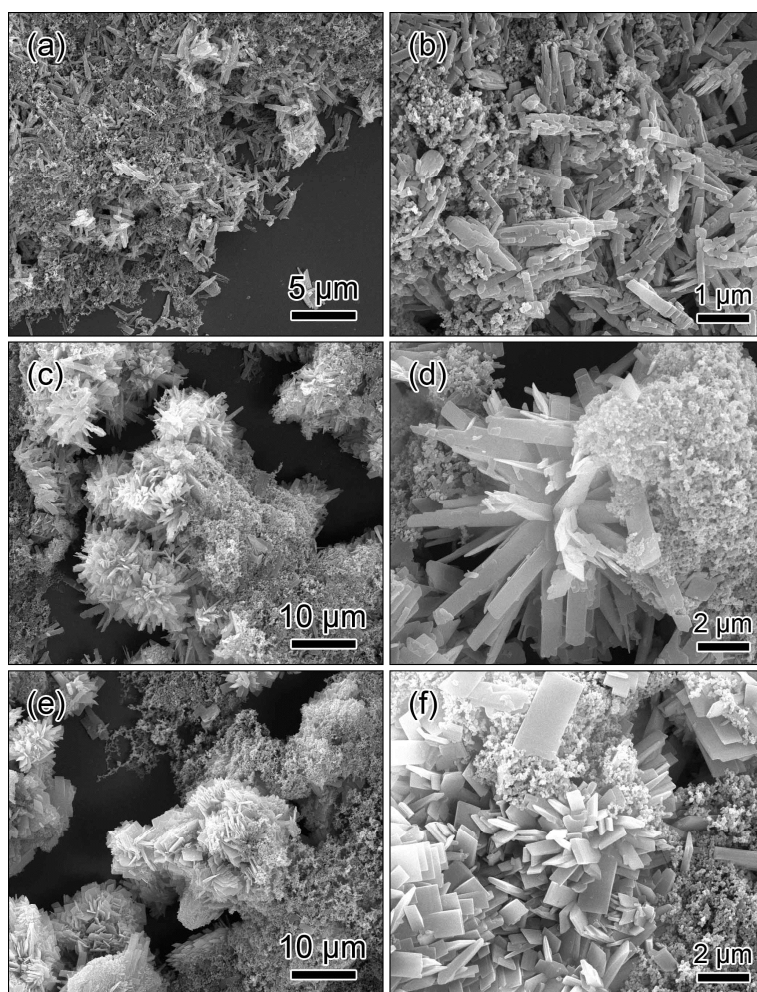

**Fig. S2** SEM images of the LiMnPO<sub>4</sub>/C composites with different morphologies obtained after the ball milling and the calcination: the dispersed wedges (a and b); the dendritic microspheres (c and d); the coarse dendritic microspheres (e and f).
